# Supplementary material
Source: PubMed Central journal article supplement (PMC9198433)
Supplement: mmc1.pdf [file mmc1.pdf]

iScience, Volume 25

## **Supplemental information**

### **Modeling explains prolonged SARS-CoV-2 nasal shedding relative to lung shedding in remdesivir-treated rhesus macaques**

**Ashish Goyal, Elizabeth R. Duke, E. Fabian Cardozo-Ojeda, and Joshua T. Schiffer**

## Supplemental figures

**Figure S1: Individual fitting to nasal viral loads in remdesivir treated animals using Ke et al.'s model [17], Related to Figure 5 and Table S5. A)** Fits to 6 treated animals who received 10 mg/kg at day 0.5 and 5 mg/kg at days 1, 2, 3, 4, 5 and 6 (solid lines). Dashed lines represent fits to vehicle group. Pink and blue dots are nasal swabs and BAL data points, respectively. Dots overlying the dotted line are below the limit of detection. Time is in days from infection. **B)** Simulated percentage of dead lung target cells as a proxy for lung damage.

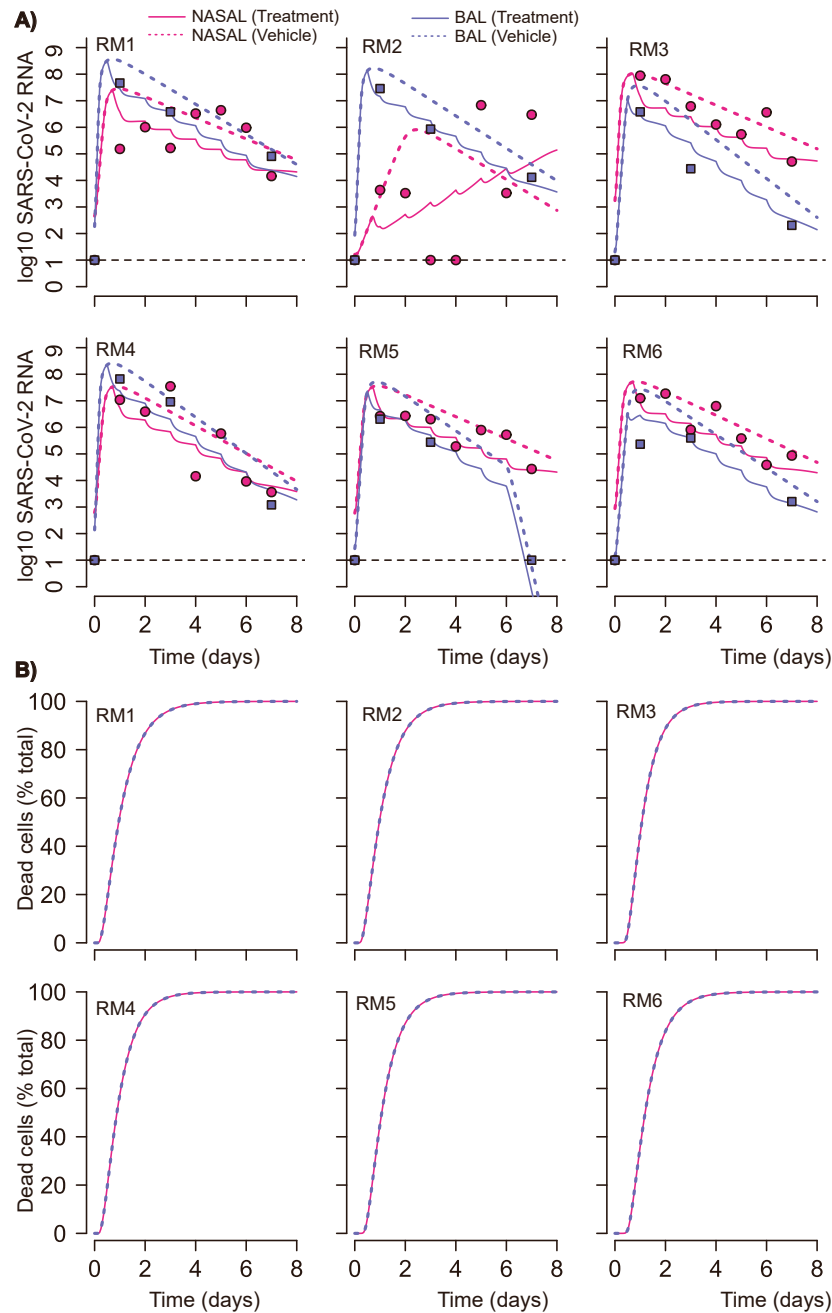

**Figure S2: Individual fitting to nasal viral loads in remdesivir treated animals, Related to Figures 5 and 7.** Fits to 5 treated animals who received 10 mg/kg at day 0.5 and 5 mg/kg at days 1, 2, 3, 4, 5 and 6. We excluded RM2 from the fitting procedure as our model cannot reproduce viral rebound on treatment, as seen in RM2. Pink dots are nasal swabs datapoints and lines are model projections. Dots overlying the dotted line are below the limit of detection. Time is in days from infection.

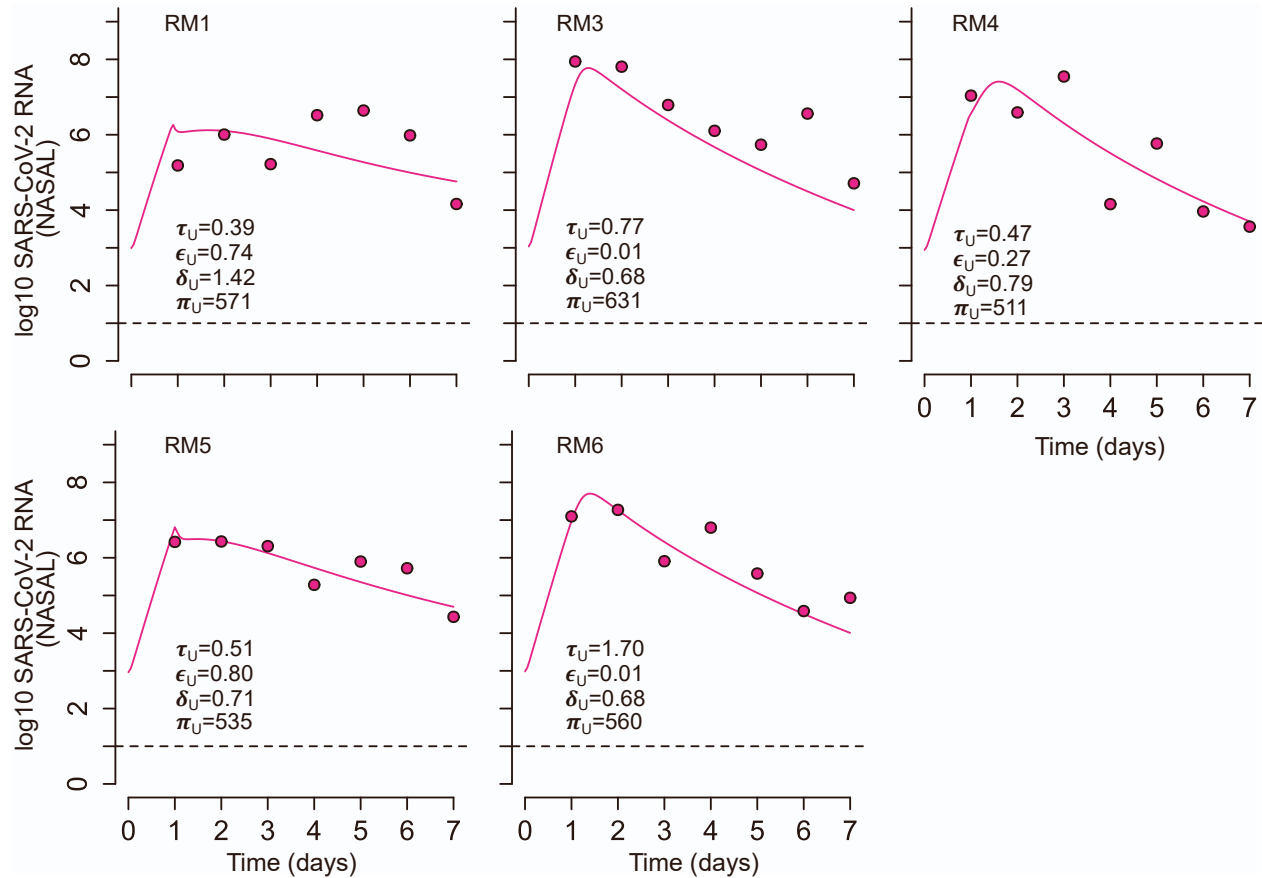

**Figure S3: Mechanisms of lung protection in remdesivir treated animals, Related to Figure 5.** The number of susceptible cells is projected for simulations fit to treatment data (solid lines) and counterfactual simulations without therapy (dashed lines). In nasal passages, therapy limits initial depletion of susceptible cells which allows for persistent viral replication rather than elimination. In the lung (BAL specimens), depletion of susceptible cells occurs in part due to the cells entering a refractory state: treatment efficacy lowers the number of susceptible cells that become refractory to infection. The depletion of susceptible cells prevents persistent shedding. Simulations are based on data from RM 1-6. Time is in days from infection.

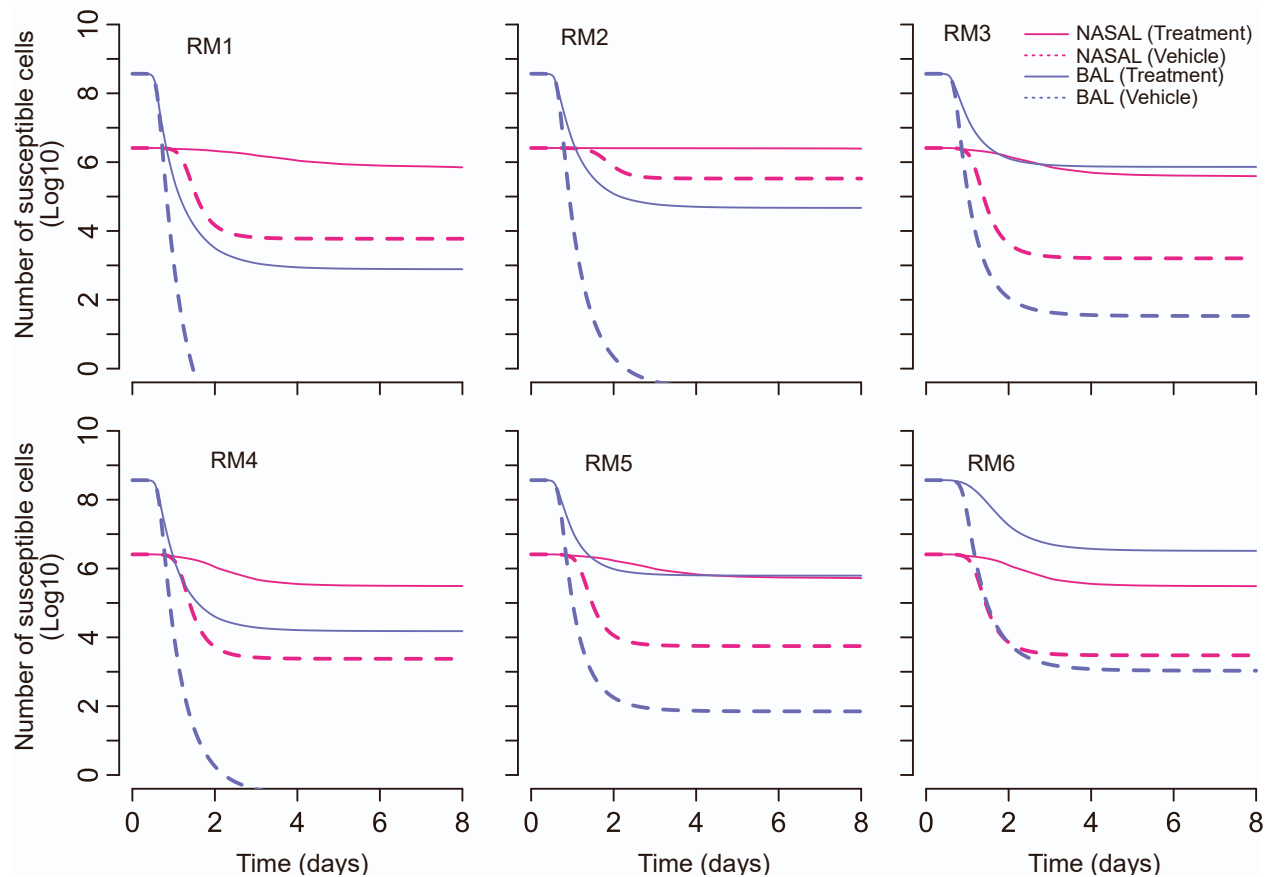

**Figure S4: Simulated percentage of dead lung target cells as a proxy for lung damage, Related to Figure 5.** We define dead cells as the initial total of susceptible cells minus susceptible cells, infected cells and refractory cells in lung at each time point. Treatment lowers the percent of dead cells relative to the counterfactual simulations without therapy. Simulations are based on data from RM 1-6. Time is in days from infection.

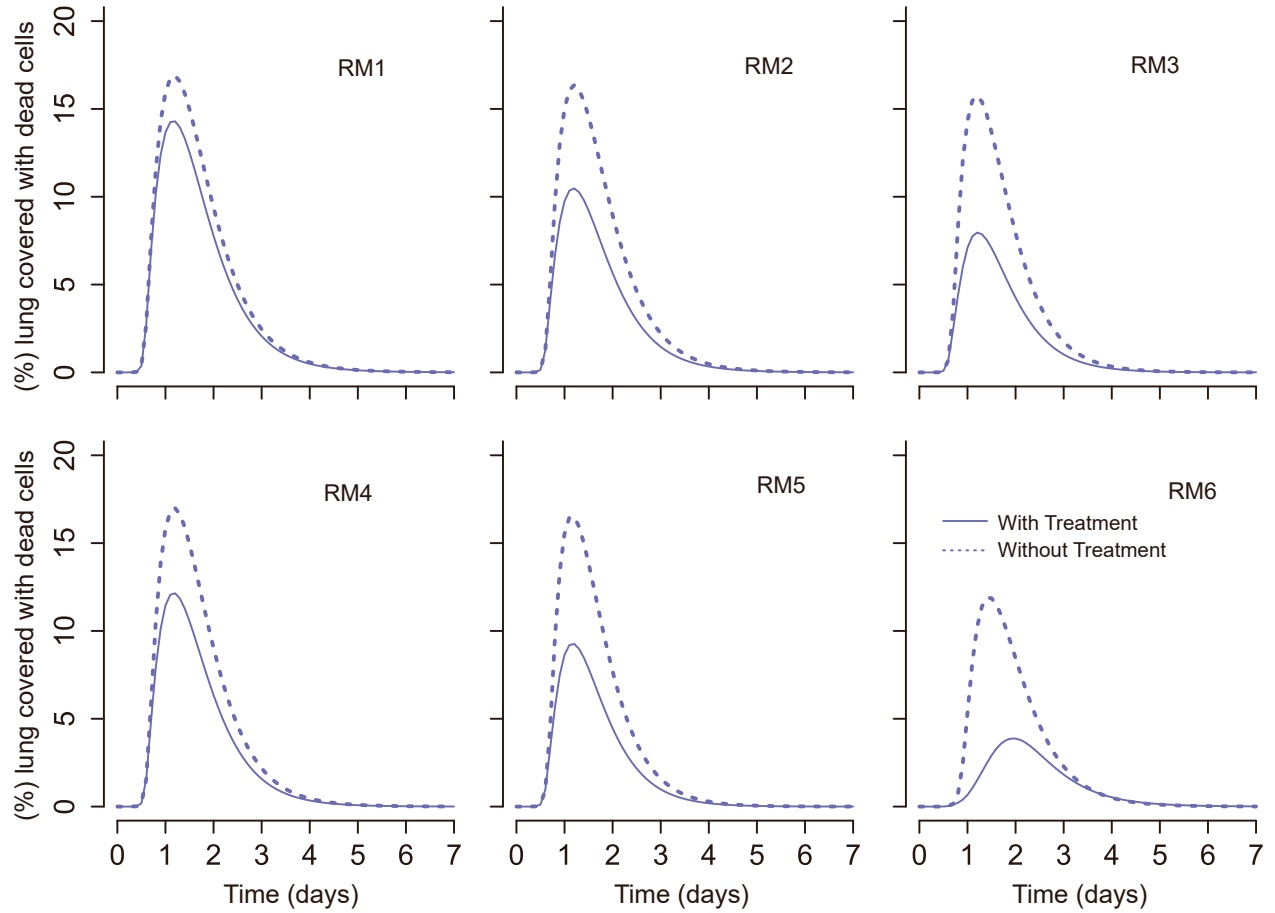

**Figure S5: Predicted outcome of more potent remdesivir therapy, Related to Figure 5.** Therapy is simulated after lowering the *in vivo*  $EC_{50}$  10-fold and 100-fold relative to data fitting in **Fig 5b**. Treatment is started 0.5 days after infection. **A.** Simulations of nasal viral load. **B.** Simulations of lung viral loads. Simulations are based on data from RM 1-6.

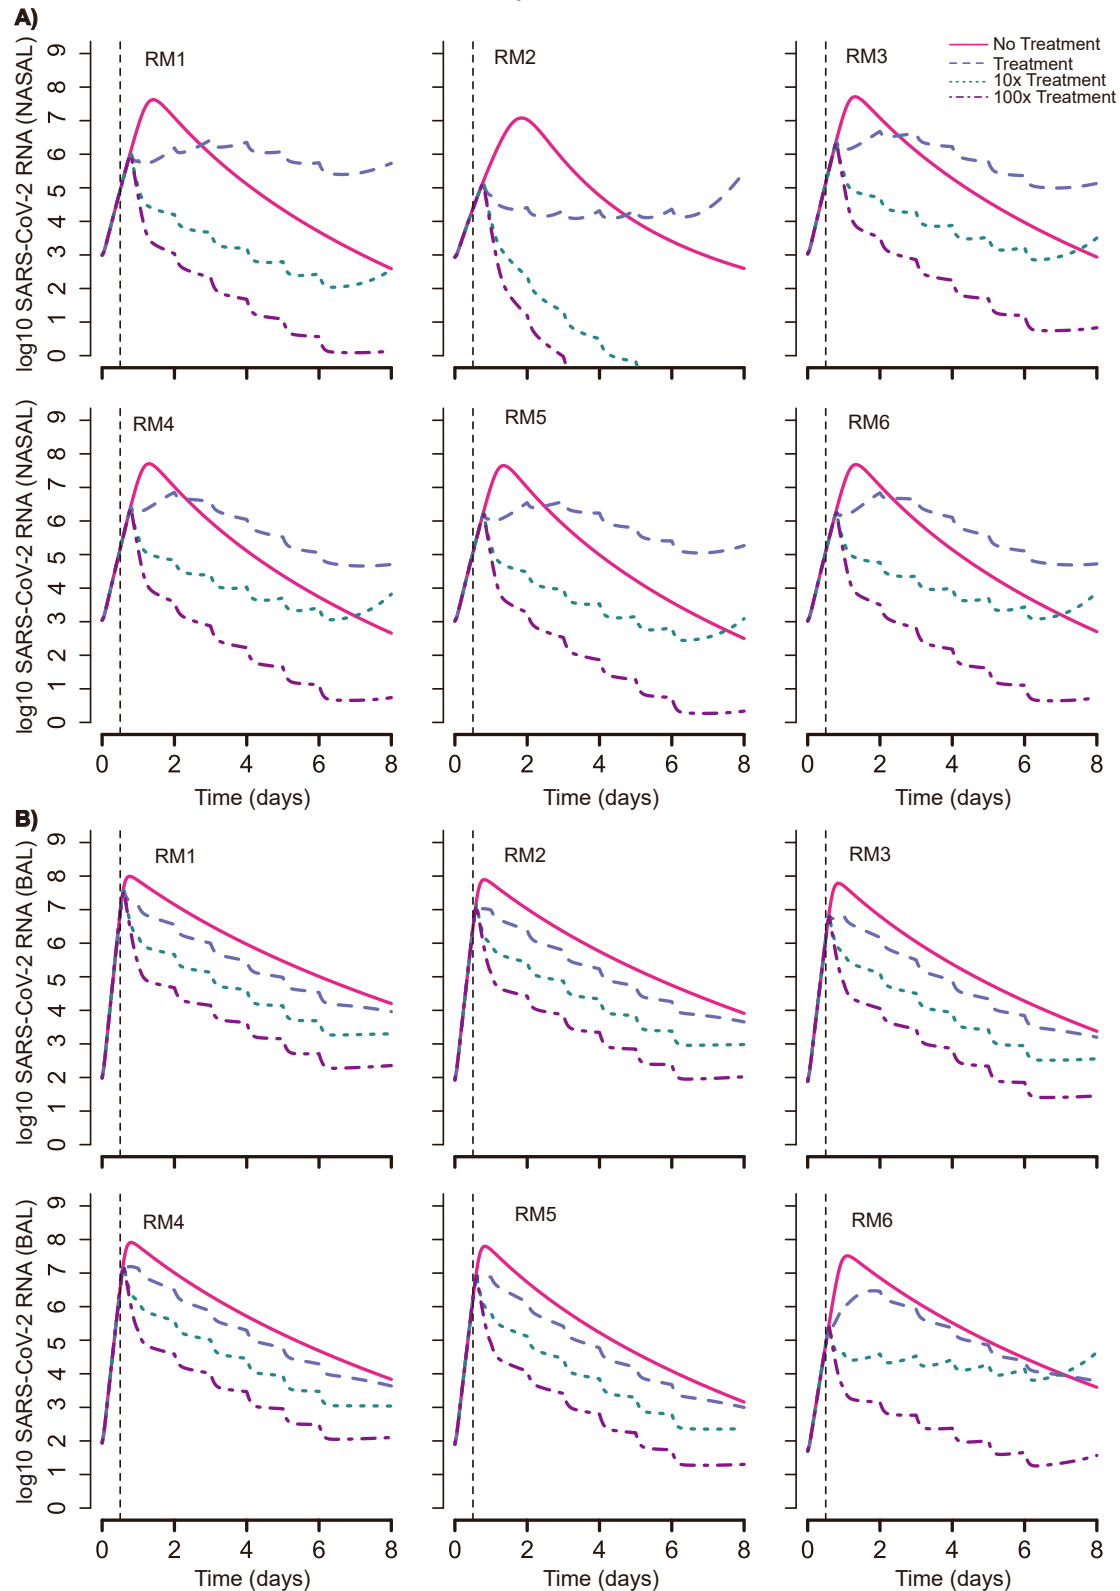

**Figure S6: Predicted outcome of later remdesivir therapy, Related to Figures 5 and 7.** Therapy is simulated with the same antiviral potencies estimated from RM 1-RM6 treated at day 0.5 but with initiation at later time points (days 2 and 4). **A.** Simulations of nasal viral load. **B.** Simulations of lung viral loads.

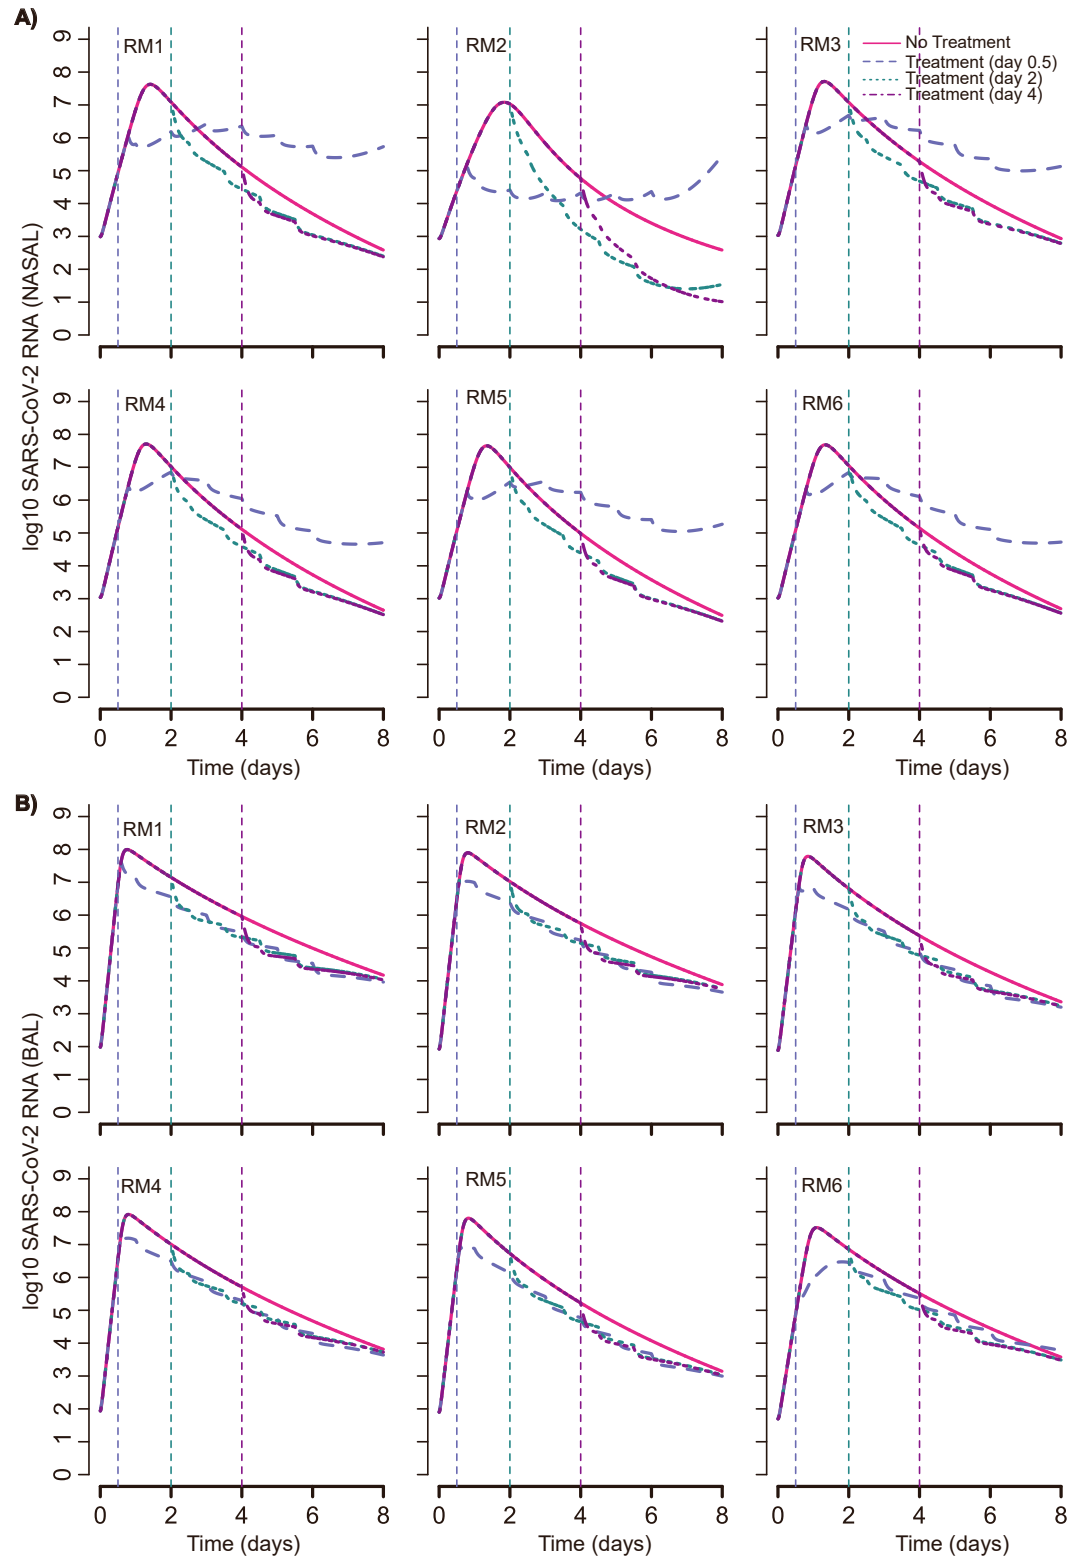

## Supplementary tables

**Table S1. Pharmacokinetic model parameters for six individual animals, RM1-RM6, Related to Figure 3.** Parameter units are:  $k_{1T}$ , /day;  $k_{2T}$ , /day;  $k_{1e}$ , /day;  $k_{2e}$ , /day;  $k_{12}$ , /day;  $k_{23}$ , /day;  $k_{34}$ , /day;  $k_3$ , /day;  $V_1$ , mL;  $V_2$ , mL;  $V_3$ , mL;  $V_{3T}$ , gm;  $V_{4T}$ , gm.

| ID  | $k_{1T}$ | $k_{2T}$           | $k_{1e}$ | $k_{2e}$ | $k_{12}$ | $k_{23}$ | $k_{34}$ | $k_3$ | $V_1$                | $V_2$                | $V_3$                | $V_{3T}$             | $V_{4T}$             |
|-----|----------|--------------------|----------|----------|----------|----------|----------|-------|----------------------|----------------------|----------------------|----------------------|----------------------|
| RM1 | 33.0     | $5.86 \times 10^3$ | 0.02     | 12.3     | 1.0      | 989.6    | 158.4    | 7.9   | $2.8 \times 10^{-3}$ | $1.1 \times 10^{-7}$ | $1.7 \times 10^{-5}$ | $3.5 \times 10^{-3}$ | $5.8 \times 10^{-5}$ |
| RM2 | 33.0     | $5.86 \times 10^3$ | 0.02     | 12.3     | 1.0      | 989.9    | 168.9    | 7.9   | $2.8 \times 10^{-3}$ | $1.1 \times 10^{-7}$ | $1.8 \times 10^{-5}$ | $4.0 \times 10^{-3}$ | $5.8 \times 10^{-5}$ |
| RM3 | 33.0     | $5.86 \times 10^3$ | 0.02     | 12.3     | 1.0      | 989.7    | 162.4    | 7.9   | $2.8 \times 10^{-3}$ | $1.1 \times 10^{-7}$ | $1.7 \times 10^{-5}$ | $3.7 \times 10^{-3}$ | $5.8 \times 10^{-5}$ |
| RM4 | 33.0     | $5.86 \times 10^3$ | 0.02     | 12.3     | 1.0      | 990.1    | 173.4    | 7.9   | $2.8 \times 10^{-3}$ | $1.1 \times 10^{-7}$ | $1.8 \times 10^{-5}$ | $4.2 \times 10^{-3}$ | $5.8 \times 10^{-5}$ |
| RM5 | 33.0     | $5.86 \times 10^3$ | 0.02     | 12.3     | 1.0      | 990.1    | 166.9    | 7.9   | $2.8 \times 10^{-3}$ | $1.1 \times 10^{-7}$ | $1.8 \times 10^{-5}$ | $3.9 \times 10^{-3}$ | $5.8 \times 10^{-5}$ |
| RM6 | 33.0     | $5.86 \times 10^3$ | 0.02     | 12.3     | 1.0      | 989.8    | 175.8    | 7.9   | $2.8 \times 10^{-3}$ | $1.1 \times 10^{-7}$ | $1.8 \times 10^{-5}$ | $4.3 \times 10^{-3}$ | $5.8 \times 10^{-5}$ |

**Table S2: Pharmacokinetic model parameters at the population level, Related to Figure 3.** Here, NA represents not available. Parameter units are:  $k_{1T}$ , /day;  $k_{2T}$ , /day;  $k_{1e}$ , /day;  $k_{2e}$ , /day;  $k_{12}$ , /day;  $k_{23}$ , /day;  $k_{34}$ , /day;  $k_3$ , /day;  $V_1$ , mL;  $V_2$ , mL;  $V_3$ , mL;  $V_{3T}$ , gm;  $V_{4T}$ , gm.

| Parameter                 | Fixed Effects | Standard deviation of the random effects | (%) RSE           |
|---------------------------|---------------|------------------------------------------|-------------------|
| $k_{1T}$                  | 33.0          | NA                                       | 5.8               |
| $\text{Log}_{10}(k_{2T})$ | 3.77          | NA                                       | 36.8              |
| $k_{1e}$                  | 0.02          | NA                                       | 17                |
| $k_{2e}$                  | 12.3          | NA                                       | 737               |
| $k_{12}$                  | 1.0           | NA                                       | 10.4              |
| $\text{Log}_{10}(k_{23})$ | 3.0           | 0.008                                    | 105               |
| $k_{34}$                  | 167.9         | 0.25                                     | $5.2 \times 10^3$ |
| $k_3$                     | 7.9           | NA                                       | 7.8               |
| $\text{Log}_{10}(V_1)$    | -2.55         | 0.008                                    | 1.4               |
| $\text{Log}_{10}(V_2)$    | -6.96         | 0.03                                     | 14.8              |
| $\text{Log}_{10}(V_3)$    | -4.77         | 0.009                                    | 68.3              |
| $\text{Log}_{10}(V_{3T})$ | -2.42         | 0.06                                     | 749               |
| $\text{Log}_{10}(V_{4T})$ | -4.24         | 0.10                                     | 6.0               |



**Table S3: Different model structures explored while fitting nasal and BAL viral loads in only untreated animals**, Related to Figures 4 and 5. The model with the lowest Akaike information criteria (AIC) is best supported by the data (denoted in bold). ‘Same’ implies that the parameter takes the value from the same distribution in two spatial compartments whereas ‘different’ implies that the parameter has different distributions in two compartments. Here, -2LL represent -2 times the log-likelihood and MOI denotes multiplicity of infection. \* and \*\* represents the case where the viral peak (either in Nasal or lung compartment) is achieved instantly and thus, these cases do not represent biological reality and are excluded from the model selection despite some of them having lower AIC.

| $\delta_i$  | $\pi_i$     | $k_i$                 | MOI       | AIC          | -2LL         |
|-------------|-------------|-----------------------|-----------|--------------|--------------|
| Diff        | Diff        | Diff                  | $10^{-3}$ | 308.1        | 278.1        |
| Diff        | Diff        | Diff                  | $10^{-4}$ | 308.4        | 278.4 **     |
| Diff        | Diff        | Diff                  | $10^{-5}$ | 307.1        | 277.1 **     |
| Diff        | Diff        | Diff                  | $10^{-6}$ | 335.4        | 305.4 *      |
| Same        | Diff        | Diff                  | $10^{-3}$ | 307.8        | 281.8 *      |
| Same        | Diff        | Diff                  | $10^{-4}$ | 307.5        | 281.5 **     |
| Same        | Diff        | Diff                  | $10^{-5}$ | 306.5        | 280.5**      |
| Same        | Diff        | Diff                  | $10^{-6}$ | 329.8        | 303.8 *      |
| Diff        | Same        | Diff                  | $10^{-3}$ | 302.5        | 276.5 **     |
| Diff        | Same        | Diff                  | $10^{-4}$ | 301.6        | 275.6 **     |
| Diff        | Same        | Diff                  | $10^{-5}$ | 305.3        | 279.3 **     |
| Diff        | Same        | Diff                  | $10^{-6}$ | 306.6        | 286.6 **     |
| Diff        | Diff        | Same                  | $10^{-3}$ | 303.4        | 277.4 **     |
| Diff        | Diff        | Same                  | $10^{-4}$ | 303.3        | 277.3 **     |
| <b>Diff</b> | <b>Diff</b> | <b>Same</b>           | $10^{-5}$ | <b>307.9</b> | <b>281.9</b> |
| Diff        | Diff        | Same                  | $10^{-6}$ | 313.7        | 287.7 *      |
| Same        | Same        | Diff                  | $10^{-3}$ | 302.8        | 280.8 *      |
| Same        | Same        | Diff                  | $10^{-4}$ | 302.3        | 280.3 *      |
| Same        | Same        | Diff                  | $10^{-5}$ | 306.3        | 284.3 *      |
| Same        | Same        | Diff                  | $10^{-6}$ | 310.6        | 288.6 *      |
| Same        | Diff        | Same                  | $10^{-3}$ | 304.5        | 282.5 *      |
| Same        | Diff        | Same                  | $10^{-4}$ | 303.4        | 281.4 *      |
| Same        | Diff        | Same                  | $10^{-5}$ | 304.9        | 282.9 *      |
| Same        | Diff        | Same                  | $10^{-6}$ | 306.4        | 284.4 *      |
| Diff        | Same        | Same                  | $10^{-3}$ | NA           | NA           |
| Diff        | Same        | Same                  | $10^{-4}$ | 297.7        | 275.7 **     |
| Diff        | Same        | Same                  | $10^{-5}$ | 297.1        | 275.1 **     |
| Diff        | Same        | Same                  | $10^{-6}$ | 299.4        | 277.4 *      |
| Same        | Same        | Same                  | $10^{-3}$ | 302.1        | 284.1        |
| Same        | Same        | Same                  | $10^{-4}$ | 300.0        | 282.0 *      |
| Same        | Same        | Same                  | $10^{-5}$ | 301.4        | 283.4 *      |
| Same        | Same        | Same                  | $10^{-6}$ | 303.2        | 285.2 **     |
| Diff        | Diff        | $k_i = 0$             | $10^{-5}$ | 318.3        | 296.3        |
| Diff        | Diff        | $k_L = 0, k_U \neq 0$ | $10^{-5}$ | 313.2        | 287.2        |
| Diff        | Diff        | $k_U = 0, k_L \neq 0$ | $10^{-5}$ | 318.3        | 292.3        |

**Table S4: Estimated population parameters from the fitting of 14 untreated animals using the best model in Table S2, Related to Figure 5.** Here, we have  $MOI(m)=10^{-5}$  and RSE represent the random deviation of the standard effects. Here, NA represents not available. Parameter units are:  $\beta$ 's, virions<sup>-1</sup> day<sup>-1</sup>;  $\delta$ 's, day<sup>-1</sup> cells<sup>-k</sup>;  $k$ 's, unitless;  $\pi$ 's day<sup>-1</sup>.

| <b>Parameter</b>                               | <b>Fixed Effects<br/>(standard deviation of the random effects)</b> | <b>(%) RSE</b> |
|------------------------------------------------|---------------------------------------------------------------------|----------------|
| Log10( $\beta_U$ )<br>(or, Log10( $\beta_L$ )) | -6.73 (NA)                                                          | 2.44           |
| $\delta_U$                                     | 0.95 (0.36)                                                         | 18.6           |
| $k_U$<br>(or, $k_L$ )                          | 0.09 (0.06)                                                         | 25.6           |
| $\pi_U$                                        | 2.77 (0.02)                                                         | 5.8            |
| $\delta_L$                                     | 0.4 (0.13)                                                          | 33.4           |
| $\pi_L$                                        | 1.0 (0.16)                                                          | 16.1           |

**Table S5: Different model structures explored while fitting nasal and BAL viral loads in untreated and remdesivir treated animals,** Related to Figures 4 and 5. The model with the lowest Akaike information criteria (AIC) is best supported by the data (denoted in bold). Models with the inclusion of refractory cells (in the form of  $\rho_i S_i$  and  $\phi_i I_i$  unless otherwise mentioned with \*) and the delayed proliferation of susceptible cells in lung but not in the nasal passage are better equipped to explain the reduced lung damage in treated animals. All version of models assume  $\theta_{LU} = 0$  and  $\theta_{UL} = 0$  as their counterpart models with  $\theta_{LU} \neq 0$  and  $\theta_{UL} \neq 0$  have higher AIC. Moreover, <sup>1</sup> denote parameters for which both fixed and random effects are estimated, <sup>2</sup> denote parameters for which only fixed effects are estimated and <sup>3</sup> denote parameters for which fixed effects with fixed random effects (=0.1) are estimated, <sup>4</sup> denote parameters for which fixed effects with fixed random effects (=0.5) are estimated and <sup>5</sup> denote parameters for which fixed effects with fixed random effects (=1.0) are estimated. Here, <sup>6</sup> represents the situation where we assume the same distribution for  $EC_{50L}$  and  $EC_{50U}$ . Here, to avoid non-identifiability issues, population parameters such as  $\beta_i$ ,  $\delta_i$ ,  $k_i$  and  $\pi_i$  were kept fixed from Table S4. We also tried Ke et al.'s approach [1] using the refractory model and the effector cell model to describe data from NASAL and BAL samples. In the refractory model, target cells are assumed can become refractory to infection through the activity of soluble immune mediators released by infected cells, such as interferon. In the immune effector cell model, innate and adaptive immune cells are assumed to be activated and recruited to eliminate infected cells, leading to increased viral clearance. Ke et al.'s model fit the data with AIC=565.4. For more details on Ke et al.'s model structure, see [1].

| Refractory cells                                                                                          | Proliferation terms                          | Delay in the antiviral activity | Estimated parameters details       | AIC   |
|-----------------------------------------------------------------------------------------------------------|----------------------------------------------|---------------------------------|------------------------------------|-------|
| <u>No</u><br>( $\rho_i$ 's=0, $\phi_i$ 's=0<br>and $\zeta_i$ 's=0)                                        | <u>No</u><br>( $r_i$ 's=0 and $\tau_i$ 's=0) | <u>No</u><br>( $v_i$ 's=0)      | $EC_{50i}^1$                       | 736.3 |
| <u>Yes</u><br>( $\rho_i$ 's=0, $\phi_i$ 's $\neq$ 0<br>and $\zeta_i$ 's=0)                                | <u>No</u><br>( $r_i$ 's=0 and $\tau_i$ 's=0) | <u>No</u><br>( $v_i$ 's=0)      | $EC_{50i}^1$ and $\phi_i^1$        | 732.1 |
| <u>Yes</u><br>( $\rho_i$ 's=0, $\phi_i$ 's $\neq$ 0<br>and $\zeta_i$ 's=0)                                | <u>No</u><br>( $r_i$ 's=0 and $\tau_i$ 's=0) | <u>No</u><br>( $v_i$ 's=0)      | $EC_{50i}^{6,2}$ and $\phi_i^1$    | 717.1 |
| <u>Yes</u><br>( $\rho_i$ 's $\neq$ 0, $\phi_i$ 's=0<br>and $\zeta_i$ 's=0)                                | <u>No</u><br>( $r_i$ 's=0 and $\tau_i$ 's=0) | <u>No</u><br>( $v_i$ 's=0)      | $EC_{50i}^1$ and $\rho_i^1$        | 726.5 |
| <u>Yes</u><br>( $\rho_i$ 's $\neq$ 0, $\phi_i$ 's=0<br>and $\zeta_i$ 's=0)                                | <u>No</u><br>( $r_i$ 's=0 and $\tau_i$ 's=0) | <u>No</u><br>( $v_i$ 's=0)      | $EC_{50i}^{6,2}$ and $\rho_i^1$    | 714.1 |
| <u>Yes (*<math>\rho_i S_i I_i</math>)</u><br>( $\rho_i$ 's $\neq$ 0, $\phi_i$ 's=0<br>and $\zeta_i$ 's=0) | <u>No</u><br>( $r_i$ 's=0 and $\tau_i$ 's=0) | <u>No</u><br>( $v_i$ 's=0)      | $EC_{50i}^1$ and $\rho_i^1$        | 717.9 |
| <u>Yes (*<math>\rho_i S_i I_i</math>)</u><br>( $\rho_i$ 's $\neq$ 0, $\phi_i$ 's=0<br>and $\zeta_i$ 's=0) | <u>No</u><br>( $r_i$ 's=0 and $\tau_i$ 's=0) | <u>No</u><br>( $v_i$ 's=0)      | $EC_{50}^{6,1}$ and $\rho_i^1$     | 707.7 |
| <u>Yes (*<math>\rho_i S_i I_i</math>)</u><br>( $\rho_i$ 's $\neq$ 0, $\phi_i$ 's=0<br>and $\zeta_i$ 's=0) | <u>No</u><br>( $r_i$ 's=0 and $\tau_i$ 's=0) | <u>No</u><br>( $v_i$ 's=0)      | $EC_{50}^{6,2}$ and $\rho_i^1$     | 701.6 |
| <u>Yes (*<math>\rho_i S_i I_i</math>)</u><br>( $\rho_i$ 's $\neq$ 0, $\phi_i$ 's=0<br>and $\zeta_i$ 's=0) | <u>No</u><br>( $r_i$ 's=0 and $\tau_i$ 's=0) | <u>No</u><br>( $v_i$ 's=0)      | $EC_{50}^{6,3}$ and $\rho_i^1$     | 714.1 |
| <u>No</u>                                                                                                 | <u>Yes</u>                                   | <u>No</u>                       | $EC_{50i}^1, r_i^2$ and $\tau_i^2$ | 732.8 |

|                                                                                                   |                                                                                 |                                |                                                                     |              |
|---------------------------------------------------------------------------------------------------|---------------------------------------------------------------------------------|--------------------------------|---------------------------------------------------------------------|--------------|
| $(\rho_i's=0, \phi_i's=0$<br>and $\zeta_i's=0)$                                                   | $(r_U=0, r_L \neq 0, \tau_U=0$<br>and $\tau_L \neq 0)$                          | $(v_i's=0)$                    |                                                                     |              |
| <u>No</u><br>$(\rho_i's=0, \phi_i's=0$<br>and $\zeta_i's=0)$                                      | <u>Yes</u><br>$(r_U=0, r_L \neq 0, \tau_U=0$<br>and $\tau_L \neq 0)$            | <u>No</u><br>$(v_i's=0)$       | $EC_{50i}^{6,2}, r_i^2$ and $\tau_i^2$                              | 722.7        |
| <u>Yes</u><br>$(\rho_i's=0, \phi_i's \neq 0$<br>and $\zeta_i's=0)$                                | <u>Yes</u><br>$(r_U = 0, r_L \neq 0, \tau_U =$<br>$0$ and $\tau_L \neq 0)$      | <u>No</u><br>$(v_i's=0)$       | $EC_{50i}^{6,2}, r_i^2, \tau_i^2$ and $\phi_i^1$                    | 701.8        |
| <u>Yes</u><br>$(\rho_i's \neq 0, \phi_i's=0$<br>and $\zeta_i's=0)$                                | <u>Yes</u><br>$(r_U = 0, r_L \neq 0, \tau_U =$<br>$0$ and $\tau_L \neq 0)$      | <u>No</u><br>$(v_i's=0)$       | $EC_{50i}^{6,2}, r_i^2, \tau_i^2$ and $\rho_i^1$                    | 700.4        |
| <u>Yes (*<math>\rho_i S_i I_i</math>)</u><br>$(\rho_i's \neq 0, \phi_i's=0$<br>and $\zeta_i's=0)$ | <u>Yes</u><br>$(r_U = 0, r_L \neq 0, \tau_U =$<br>$0$ and $\tau_L \neq 0)$      | <u>No</u><br>$(v_i's=0)$       | $EC_{50i}^{6,2}, r_i^2, \tau_i^2$ and $\rho_i^1$                    | 698.0        |
| <u>Yes (*<math>\rho_i S_i I_i</math>)</u><br>$(\rho_i's \neq 0, \phi_i's=0$<br>and $\zeta_i's=0)$ | <u>Yes</u><br>$(r_U = 0, r_L \neq 0, \tau_U =$<br>$0$ and $\tau_L \neq 0)$      | <u>Yes</u><br>$(v_i's \neq 0)$ | $EC_{50i}^{6,2}, r_i^2, \tau_i^2, \rho_i^2$ and<br>$v_i^2$          | 677.6        |
| <u>Yes (*<math>\rho_i S_i I_i</math>)</u><br>$(\rho_i's \neq 0, \phi_i's=0$<br>and $\zeta_i's=0)$ | <u>Yes</u><br>$(r_U = 0, r_L \neq 0, \tau_U =$<br>$0$ and $\tau_L \neq 0)$      | <u>Yes</u><br>$(v_i's \neq 0)$ | $EC_{50i}^{6,2}, r_i^2, \tau_i^2, \rho_i^3$ and<br>$v_i^3$          | 668.7        |
| <u>Yes (*<math>\rho_i S_i I_i</math>)</u><br>$(\rho_i's \neq 0, \phi_i's=0$<br>and $\zeta_i's=0)$ | <u>Yes</u><br>$(r_U = 0, r_L \neq$<br>$0, \tau_U = 0$ and $\tau_L \neq$<br>$0)$ | <u>Yes</u><br>$(v_i's \neq 0)$ | $EC_{50i}^{6,2}, r_i^2, \tau_i=0, \rho_i^3$<br>and $v_i^3$          | <b>666.8</b> |
| <u>Yes (*<math>\rho_i S_i I_i</math>)</u><br>$(\rho_i's \neq 0, \phi_i's=0$<br>and $\zeta_i's=0)$ | <u>Yes</u><br>$(r_U = 0, r_L \neq 0, \tau_U =$<br>$0$ and $\tau_L \neq 0)$      | <u>Yes</u><br>$(v_i's \neq 0)$ | $EC_{50i}^{6,2}, r_i^2, \tau_i^2, \rho_i^3$ and<br>$v_U^3, v_L = 0$ | 670.7        |
| <u>Yes (*<math>\rho_i S_i I_i</math>)</u><br>$(\rho_i's \neq 0, \phi_i's=0$<br>and $\zeta_i's=0)$ | <u>Yes</u><br>$(r_U = 0, r_L \neq 0, \tau_U =$<br>$0$ and $\tau_L \neq 0)$      | <u>Yes</u><br>$(v_i's \neq 0)$ | $EC_{50i}^{6,2}, r_i^2, \tau_i^2, \rho_i^4$ and<br>$v_i^4$          | 683.8        |
| <u>Yes (*<math>\rho_i S_i I_i</math>)</u><br>$(\rho_i's \neq 0, \phi_i's=0$<br>and $\zeta_i's=0)$ | <u>Yes</u><br>$(r_U = 0, r_L \neq 0, \tau_U =$<br>$0$ and $\tau_L \neq 0)$      | <u>Yes</u><br>$(v_i's \neq 0)$ | $EC_{50i}^{6,2}, r_i^2, \tau_i^2, \rho_i^3$ and<br>$v_i^{6,3}$      | 680.0        |

**Table S6: Estimated parameters under the model depicted in Figure 4b**, Related to Figures 4 and 5. We also estimated only the fixed effects of four parameters:  $EC_{50U} = EC_{50L} = 2.2$  nM/gm,  $\tau_L = 0$  days and  $r_L = 2.0$ /day while fixing  $\beta = 1.9 \times 10^{-7}$  virions<sup>-1</sup>.day<sup>-1</sup>. In absence of the data on active metabolite concentration, the concentration of nucleoside GS-441524 in tissue (Nuc) was employed as a proxy to calculate  $EC_{50}$  [2]. Parameter units are:  $\delta$ 's, day<sup>-1</sup> cells<sup>-k</sup>;  $k$ 's, unitless;  $\pi$ 's, day<sup>-1</sup>;  $\rho_L$ ; day<sup>-1</sup> cells<sup>-1</sup>.

|               | $k_U = k_L$ | $\delta_U$ | Log10<br>( $\pi_U$ ) | $\delta_L$ | Log10<br>( $\pi_L$ ) | Log10<br>( $\rho_L$ ) | $v_U$<br>(days) | $v_L$<br>(days) | Category       |
|---------------|-------------|------------|----------------------|------------|----------------------|-----------------------|-----------------|-----------------|----------------|
| RM1           | 0.09        | 0.97       | 2.76                 | 0.37       | 1.15                 | -6.89                 | 0.29            | 0.09            | RDV            |
| RM2           | 0.09        | 2.34       | 2.70                 | 0.40       | 1.09                 | -6.88                 | 0.28            | 0.09            | RDV            |
| RM3           | 0.09        | 0.83       | 2.80                 | 0.46       | 1.05                 | -6.84                 | 0.29            | 0.09            | RDV            |
| RM4           | 0.09        | 0.92       | 2.80                 | 0.41       | 1.10                 | -6.89                 | 0.29            | 0.09            | RDV            |
| RM5           | 0.09        | 0.96       | 2.78                 | 0.49       | 1.06                 | -6.84                 | 0.29            | 0.09            | RDV            |
| RM6           | 0.09        | 0.91       | 2.79                 | 0.42       | 0.86                 | -6.86                 | 0.29            | 0.09            | RDV            |
| RM7           | 0.09        | 1.33       | 2.78                 | 0.37       | 1.07                 | -6.90                 | NA              | NA              | VEHICLE        |
| RM8           | 0.09        | 1.44       | 2.77                 | 0.41       | 0.94                 | -6.86                 | NA              | NA              | VEHICLE        |
| RM9           | 0.09        | 1.10       | 2.78                 | 0.41       | 1.0                  | -6.88                 | NA              | NA              | VEHICLE        |
| RM10          | 0.08        | 0.77       | 2.78                 | 0.38       | 1.06                 | -6.89                 | NA              | NA              | VEHICLE        |
| RM11          | 0.08        | 1.11       | 2.76                 | 0.37       | 1.03                 | -6.88                 | NA              | NA              | VEHICLE        |
| RM12          | 0.09        | 0.82       | 2.77                 | 0.41       | 1.01                 | -6.88                 | NA              | NA              | VEHICLE        |
| RM13          | 0.09        | 0.85       | 2.78                 | 0.40       | 1.00                 | -6.88                 | NA              | NA              | VEHICLE        |
| RM14          | 0.09        | 0.83       | 2.77                 | 0.40       | 1.00                 | -6.88                 | NA              | NA              | VEHICLE        |
| RM15          | 0.09        | 0.95       | 2.77                 | 0.40       | 1.00                 | -6.88                 | NA              | NA              | VEHICLE        |
| RM16          | 0.09        | 0.94       | 2.76                 | 0.40       | 1.00                 | -6.88                 | NA              | NA              | VEHICLE        |
| RM17          | 0.09        | 0.81       | 2.77                 | 0.38       | 1.06                 | -6.89                 | NA              | NA              | VEHICLE        |
| RM18          | 0.09        | 0.69       | 2.77                 | 0.42       | 0.96                 | -6.86                 | NA              | NA              | VEHICLE        |
| RM19          | 0.09        | 0.68       | 2.77                 | 0.38       | 1.06                 | -6.89                 | NA              | NA              | VEHICLE        |
| RM20          | 0.09        | 1.23       | 2.77                 | 0.38       | 1.06                 | -6.89                 | NA              | NA              | VEHICLE        |
| <b>Median</b> | 0.09        | 0.94       | 2.79                 | 0.42       | 1.08                 | -6.87                 | 0.29            | 0.09            | <b>RDV</b>     |
| <b>Median</b> | 0.09        | 0.89       | 2.77                 | 0.40       | 1.01                 | -6.88                 | NA              | NA              | <b>VEHICLE</b> |

**Table S7: Pharmacokinetic model parameters at the population level from the fitting of 14 untreated animals and 6 treated animals using the best model in Table S5**, Related to Figures 4 and 5. Here, NA represents not available. Parameter units are:  $EC_{50}$ , nM/gm;  $r_L$ , day<sup>-1</sup>;  $v$ 's, day;  $\rho_L$ ; day<sup>-1</sup> cells<sup>-1</sup>.

| Parameter          | Fixed Effects | Standard deviation of the random effects | (%) RSE |
|--------------------|---------------|------------------------------------------|---------|
| Log10( $EC_{50}$ ) | 0.34          | NA                                       | 32      |
| $r_L$              | 2             | NA                                       | 0.08    |
| $v_U$              | 0.29          | 0.1 (fixed)                              | 42      |
| $v_L$              | 0.09          | 0.1 (fixed)                              | 176     |
| Log10( $\rho_L$ )  | -6.88         | 0.1 (fixed)                              | 3.17    |

## References

1. Ke, R., et al., Daily sampling of early SARS-CoV-2 infection reveals substantial heterogeneity in infectiousness. medRxiv, 2021: p. 2021.07.12.21260208.
2. Williamson, B.N., et al., Clinical benefit of remdesivir in rhesus macaques infected with SARS-CoV-2. Nature, 2020.
